# Supplementary material for: Structure Determination of F4TCNQ on Ag(111): A Systematic Trend in Metal Adatom Incorporation
Source: PubMed Central journal article supplement (PMC11270728; doi:10.1021/acsomega.4c04860), 2024-07-10
Supplement: ao4c04860_si_001.pdf [file ao4c04860_si_001.pdf]

## SUPPLEMENTARY INFORMATION

### Structure Determination of F<sub>4</sub>TCNQ on Ag(111): a Systematic Trend in Metal Adatom Incorporation

**Archie L. Hobson<sup>1,2</sup>, Hadeel Hussain<sup>2</sup>, Philip J. Mousley<sup>2</sup>, David A. Duncan<sup>2</sup>, Mona Braim<sup>1</sup>, Giovanni Costantini<sup>3</sup>, Christopher Nicklin<sup>2</sup>, D. Phil Woodruff<sup>1\*</sup>**

*<sup>1</sup>Department of Physics, University of Warwick, Coventry CV4 7AL, UK*

*<sup>2</sup>Diamond Light Source, Harwell Science and Innovation Campus, Didcot, OX11 0DE,*

*<sup>3</sup>School of Chemistry, University of Birmingham, Edgbaston, Birmingham B15 2TT, UK*

---

\* email [d.p.woodruff@warwick.ac.uk](mailto:d.p.woodruff@warwick.ac.uk)

## NIXSW

Figure S1 shows the experimental NIXSW absorption profiles together with the best-fit results corresponding to the coherent fraction and position values reported in Table 1 of the main manuscript.

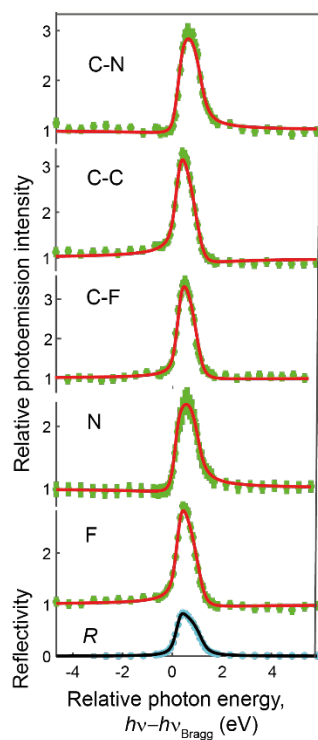

**Figure S1** individual C 1s, N 1s and F 1s experimental NIXSW profiles (green data points) and best-fit theory curves (red lines) corresponding to the coherent fraction and coherent position values reported in Table 1. Also shown is the reflectivity,  $R$ .

Figures S2 and S3 shows comparisons of the experimental CTRs and FORs, respectively, with the results of simulations for the best-fit adatom and best-fit no adatom structural models.

## SXRD

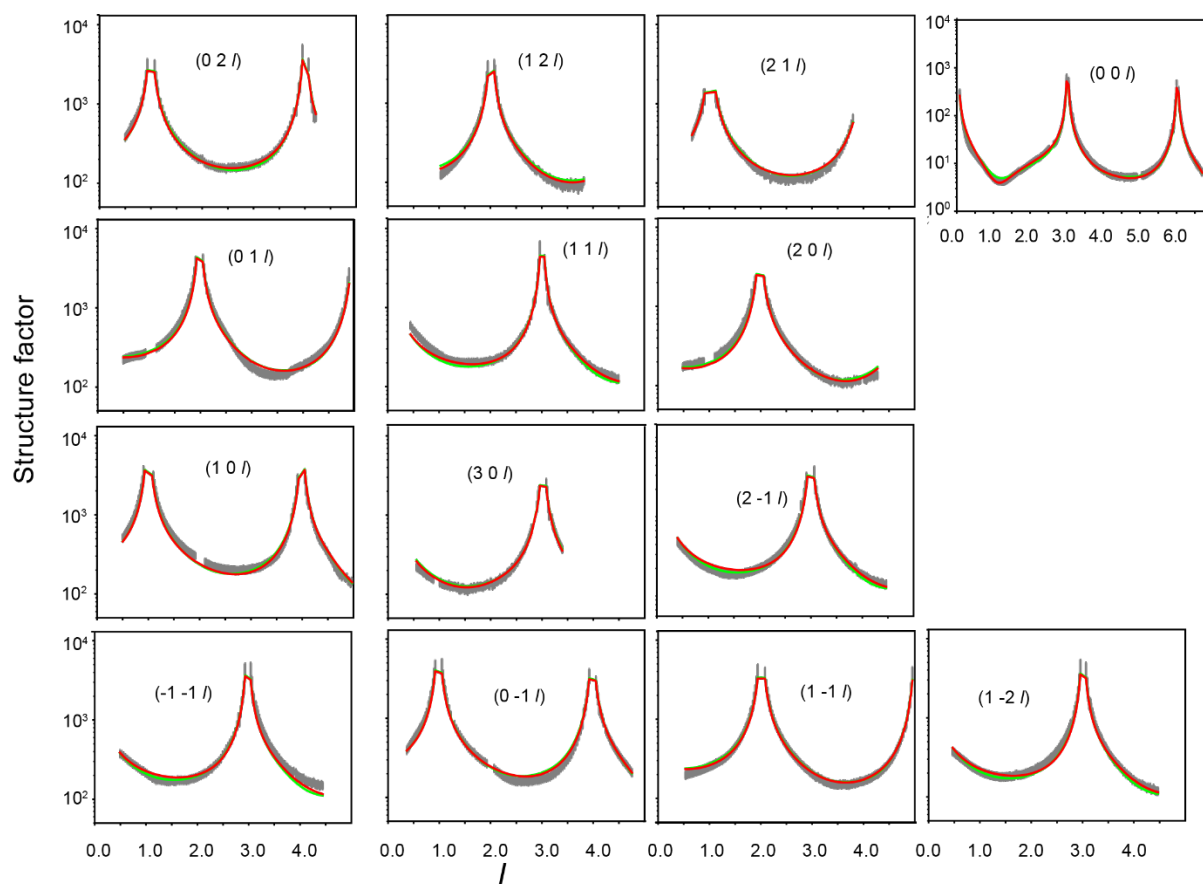

**Figure S2** Experimental CTRs (grey data points) compared with the results of simulations for the best-fit adatom model (red curves) and the best-fit no-adatom model (green curves).

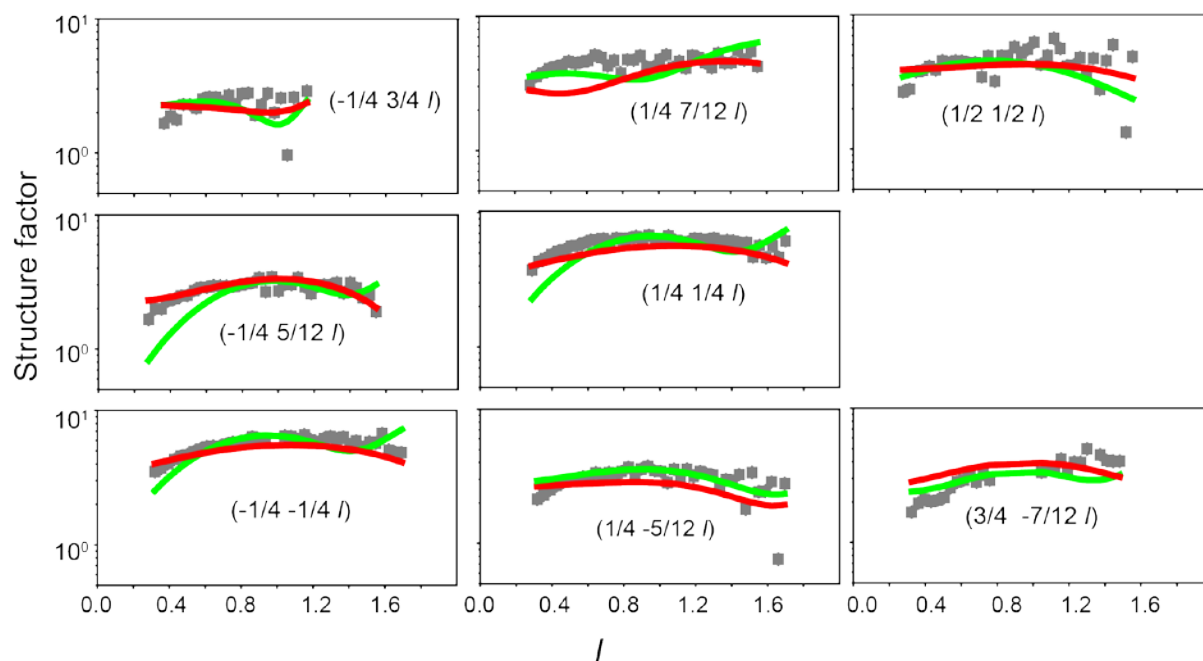

**Figure S3** Experimental FORs (grey data points) compared with the results of simulations for the best-fit adatom model (red curves) and the best-fit no-adatom model (green curves).

## Two-atom structural model

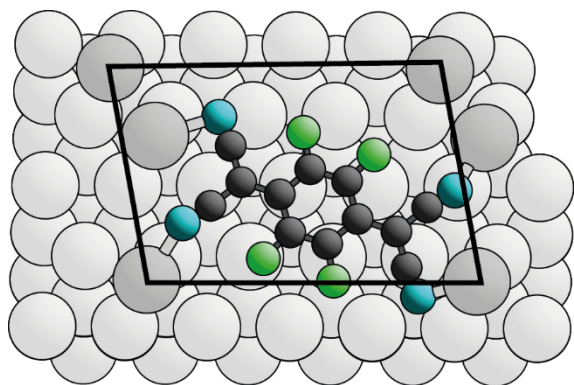

**Figure S4** Plan view of the two-atom model of the Ag(111)  $\begin{bmatrix} 4 & 0 \\ 1 & 3 \end{bmatrix}$  F<sub>4</sub>TCNQ structure giving the lowest value of  $\chi^2$  by SXRD. Atom colouring as in Figure 6 of the main manuscript.
